# Supplementary material for: Investigating naproxen removal from pharmaceutical factory effluents using UVA/MIL-88-A/PS and solar/MIL-88-A/PS systems
Source: Royal Society of Chemistry journal article supplement (doi:10.1039/d3va00290j), 2023-11-23
Supplement: d3va00290j1.pdf [file d3va00290j1.pdf]

**Electronic Supporting Information for**

**Investigating Naproxen Removal from Pharmaceutical Factory Effluents  
Using UVA/MIL-88-A/PS and Solar/MIL-88-A/PS Systems**

Sarah Ghazali<sup>a</sup>, Abbas Baalbaki<sup>a</sup>, Weam Bou Karroum<sup>a</sup>, Alice Bejjani<sup>b\*</sup>, Antoine Ghauch<sup>a\*</sup>

<sup>a</sup>American University of Beirut, Faculty of Arts and Sciences, Department of Chemistry

P.O. Box 11-0236 Riad El Solh - 1107-2020 Beirut – Lebanon

<sup>b</sup> Lebanese Atomic Energy Commission, CNRS, Research and Development department

P.O. Box 11-8281, 1107-2260 Riad El Solh - Beirut – Lebanon

Prepared for Environmental Science: Advances Journal

\*Corresponding authors:

Antoine Ghauch: [antoine.ghauch@aub.edu.lb](mailto:antoine.ghauch@aub.edu.lb) Tel/fax: +961 1350000/+961 1 365217

Alice Bejjani: [abejjani@cnrs.edu.lb](mailto:abejjani@cnrs.edu.lb) Tel/fax: +961 1 450811/+961 1 450810

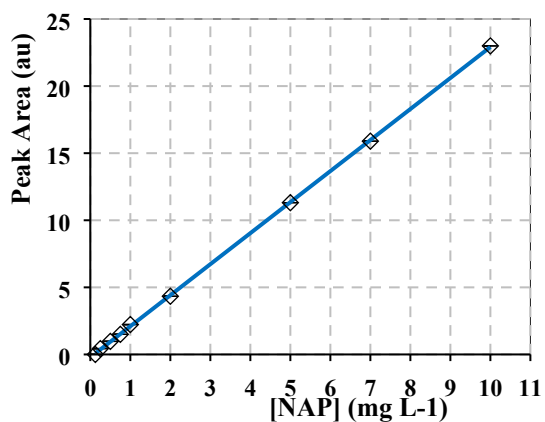

| Linest Output NAP |          |          |                |
|-------------------|----------|----------|----------------|
| y = mx + b        |          |          |                |
| m                 | 2.312642 | -0.21149 | b              |
| s <sub>m</sub>    | 0.008292 | 0.037073 | s <sub>b</sub> |
| R <sup>2</sup>    | 0.99991  | 0.083388 | s <sub>y</sub> |

(a)

(b)

**Fig. S1.** (a) HPLC-DAD calibration curve for NAP. The error bars are calculated at 95% confidence level. Absorbance =  $A(\text{mean}) \pm \frac{ts}{\sqrt{n}}$ , where t is the student value (t = 2.447 for 6 degrees of freedom at 95% confidence level) and s the standard deviation of 7 replicates. (b) The LINEST output calculated through Excel provided the slope, y-intercept, the regression coefficient, and all statistical data including standard deviations on variables.

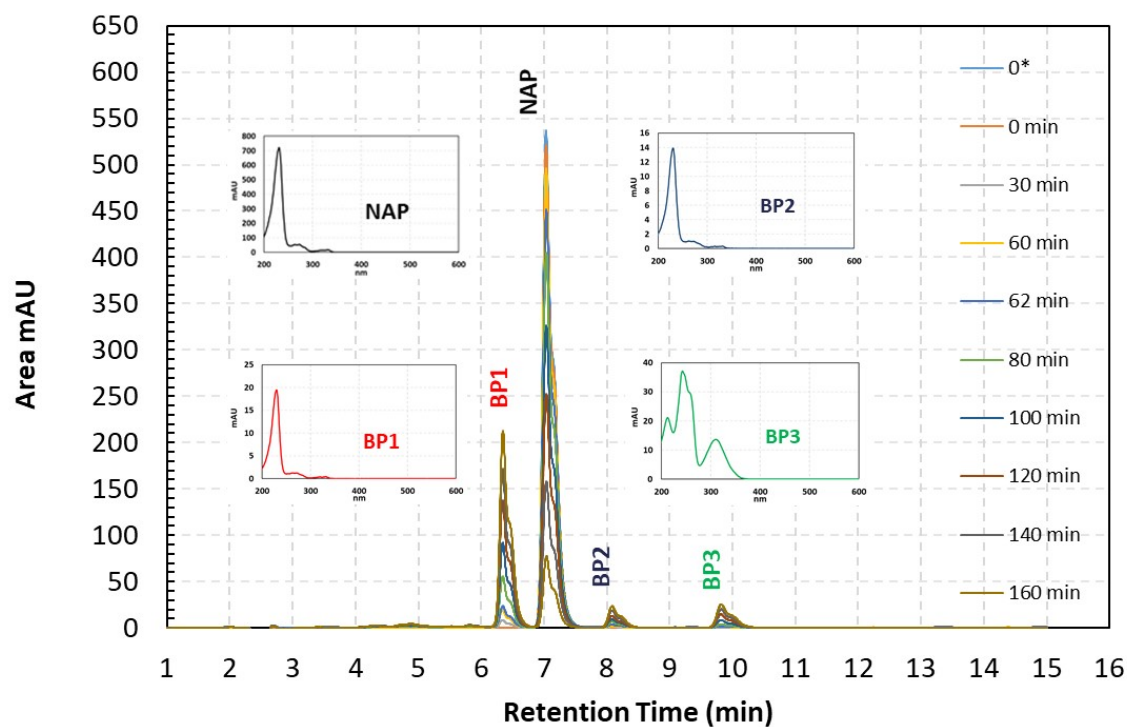

**Fig. S2.** Chromatogram of NAP extracted at 228 nm showing the by-products formed at 6.30, 8.06 and 9.79 min, respectively under UVA irradiation in UVA/MIL-88-A/PS system.

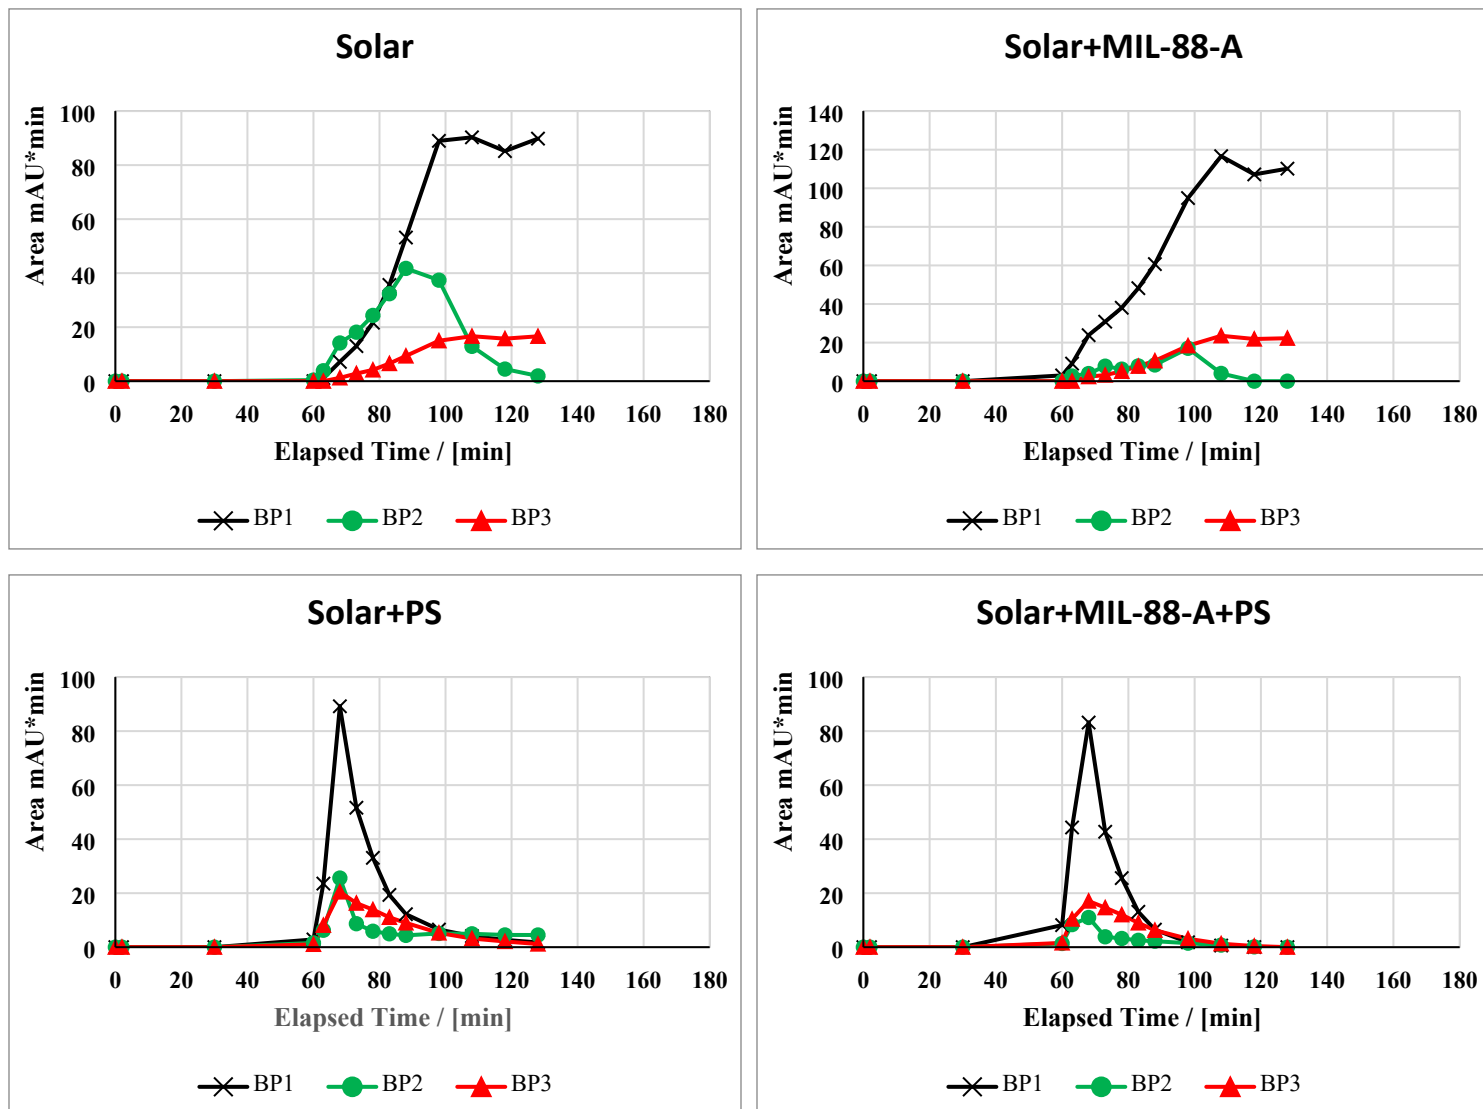

**Fig. S3.** Degradation by-products profile under different conditions: Solar/MIL-88-A/PS system control in the presence and/or absence of MIL-88-A and PS. Experimental conditions:  $[NAP]_0 = 50 \text{ mg L}^{-1}$ ,  $[PS]_0 = 2 \text{ mM}$ ,  $[MIL-88-A]_0 = 25 \text{ mg L}^{-1}$ .

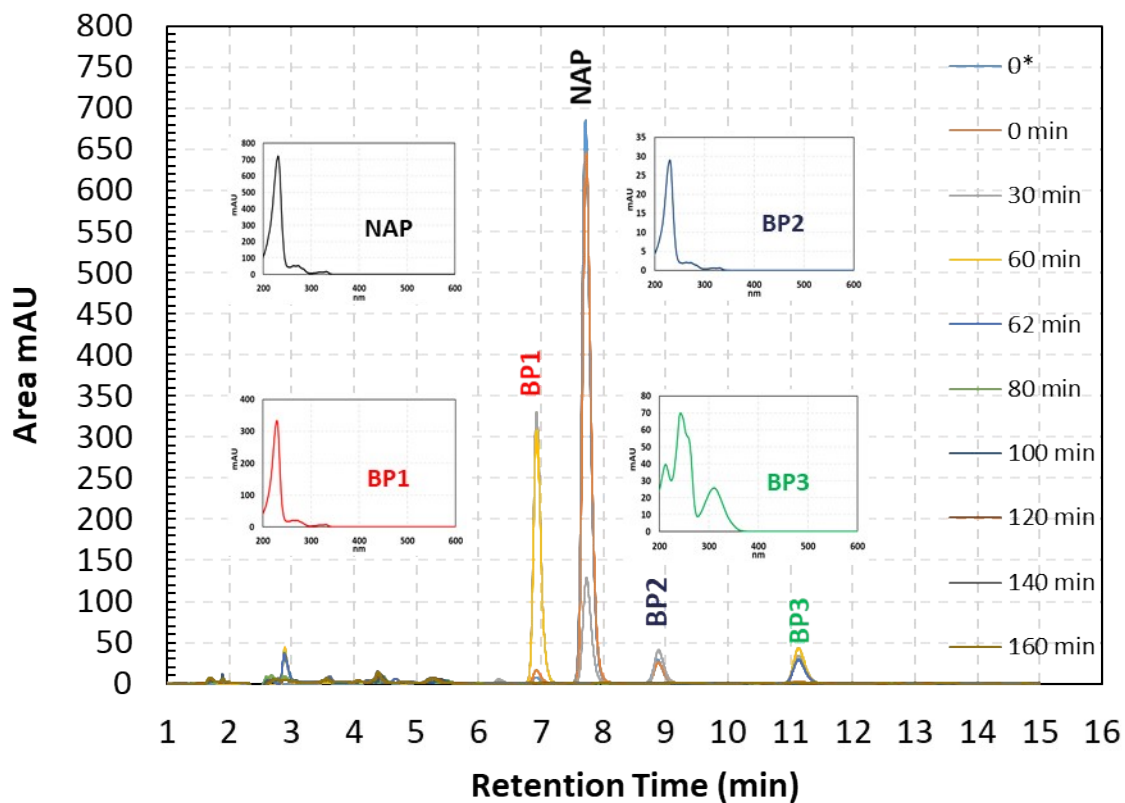

**Fig. S4.** Chromatogram of NAP extracted at 228 nm showing the by-products formed at 6.93, 8.73 and 11.13 min, respectively under Solar/MIL-88-A/PS system.

**Table S1.** pH values under different experimental conditions for the (a) UVA/MIL-88-A/PS/NAP system and (b) Solar/MIL-88-A/PS/NAP system

| <b>Case of chlorides</b>                                  |                   |                 |
|-----------------------------------------------------------|-------------------|-----------------|
| <b>(a) UVA system</b>                                     | <b>pH initial</b> | <b>pH final</b> |
| [NaCl] free                                               | 6.10              | 3.73            |
| [NaCl] = 200 mg L <sup>-1</sup>                           | 6.11              | 4.24            |
| [NaCl] = 2000 mg L <sup>-1</sup>                          | 5.72              | 4.29            |
| [NaCl] = 20 000 mg L <sup>-1</sup>                        | 5.79              | 4.56            |
| <b>(b) Solar system</b>                                   |                   |                 |
| <b>(a) UVA system</b>                                     | <b>pH initial</b> | <b>pH final</b> |
| [NaCl] free                                               | 6.12              | 2.51            |
| [NaCl] = 200 mg L <sup>-1</sup>                           | 6.85              | 2.59            |
| [NaCl] = 2000 mg L <sup>-1</sup>                          | 6.41              | 2.78            |
| [NaCl] = 20 000 mg L <sup>-1</sup>                        | 6.49              | 2.93            |
| <b>Case of phosphates (phosphate buffer (PB) at pH=4)</b> |                   |                 |
| <b>(a) UVA system</b>                                     | <b>pH initial</b> | <b>pH final</b> |
| [PB] free                                                 | 6.10              | 3.73            |
| [PB] = 1 mM                                               | 5.41              | 4.32            |
| [PB] = 5 mM                                               | 4.91              | 4.3             |
| [PB] = 10 mM                                              | 4.66              | 4.25            |
| <b>(b) Solar system</b>                                   |                   |                 |
| <b>(a) UVA system</b>                                     | <b>pH initial</b> | <b>pH final</b> |
| [PB] free                                                 | 6.12              | 2.51            |
| [PB] = 1 mM                                               | 5.81              | 2.99            |
| [PB] = 5 mM                                               | 5.11              | 3.16            |
| [PB] = 10 mM                                              | 4.83              | 3.27            |
| <b>pH effect (10 mM phosphate buffer)</b>                 |                   |                 |
| <b>(a) UVA system</b>                                     | <b>pH initial</b> | <b>pH final</b> |
| control                                                   | 6.10              | 3.73            |
| [pH] = 4                                                  | 4.68              | 4.28            |
| [pH] = 7                                                  | 7.39              | 7.34            |
| [pH] = 9                                                  | 8.82              | 8.41            |
| <b>(b) Solar system</b>                                   |                   |                 |
| <b>(a) UVA system</b>                                     | <b>pH initial</b> | <b>pH final</b> |
| control                                                   | 6.12              | 2.51            |
| [pH] = 4                                                  | 4.63              | 3.20            |
| [pH] = 7                                                  | 7.23              | 7.08            |
| [pH] = 9                                                  | 8.51              | 7.50            |

| <b>Case of bicarbonates</b>  |                   |                 |
|------------------------------|-------------------|-----------------|
| <b>(a) UVA system</b>        | <b>pH initial</b> | <b>pH final</b> |
| $[HCO_3^-]$ free             | 6.10              | 3.73            |
| $[HCO_3^-] = 1 \text{ mM}$   | 8.05              | 7.02            |
| $[HCO_3^-] = 50 \text{ mM}$  | 8.59              | 8.54            |
| $[HCO_3^-] = 100 \text{ mM}$ | 8.56              | 8.59            |
| <b>(b) Solar system</b>      |                   |                 |
| <b>(b) Solar system</b>      | <b>pH initial</b> | <b>pH final</b> |
| $[HCO_3^-]$ free             | 6.12              | 2.51            |
| $[HCO_3^-] = 1 \text{ mM}$   | 8.09              | 2.88            |
| $[HCO_3^-] = 50 \text{ mM}$  | 9.04              | 8.78            |
| $[HCO_3^-] = 100 \text{ mM}$ | 8.84              | 8.91            |

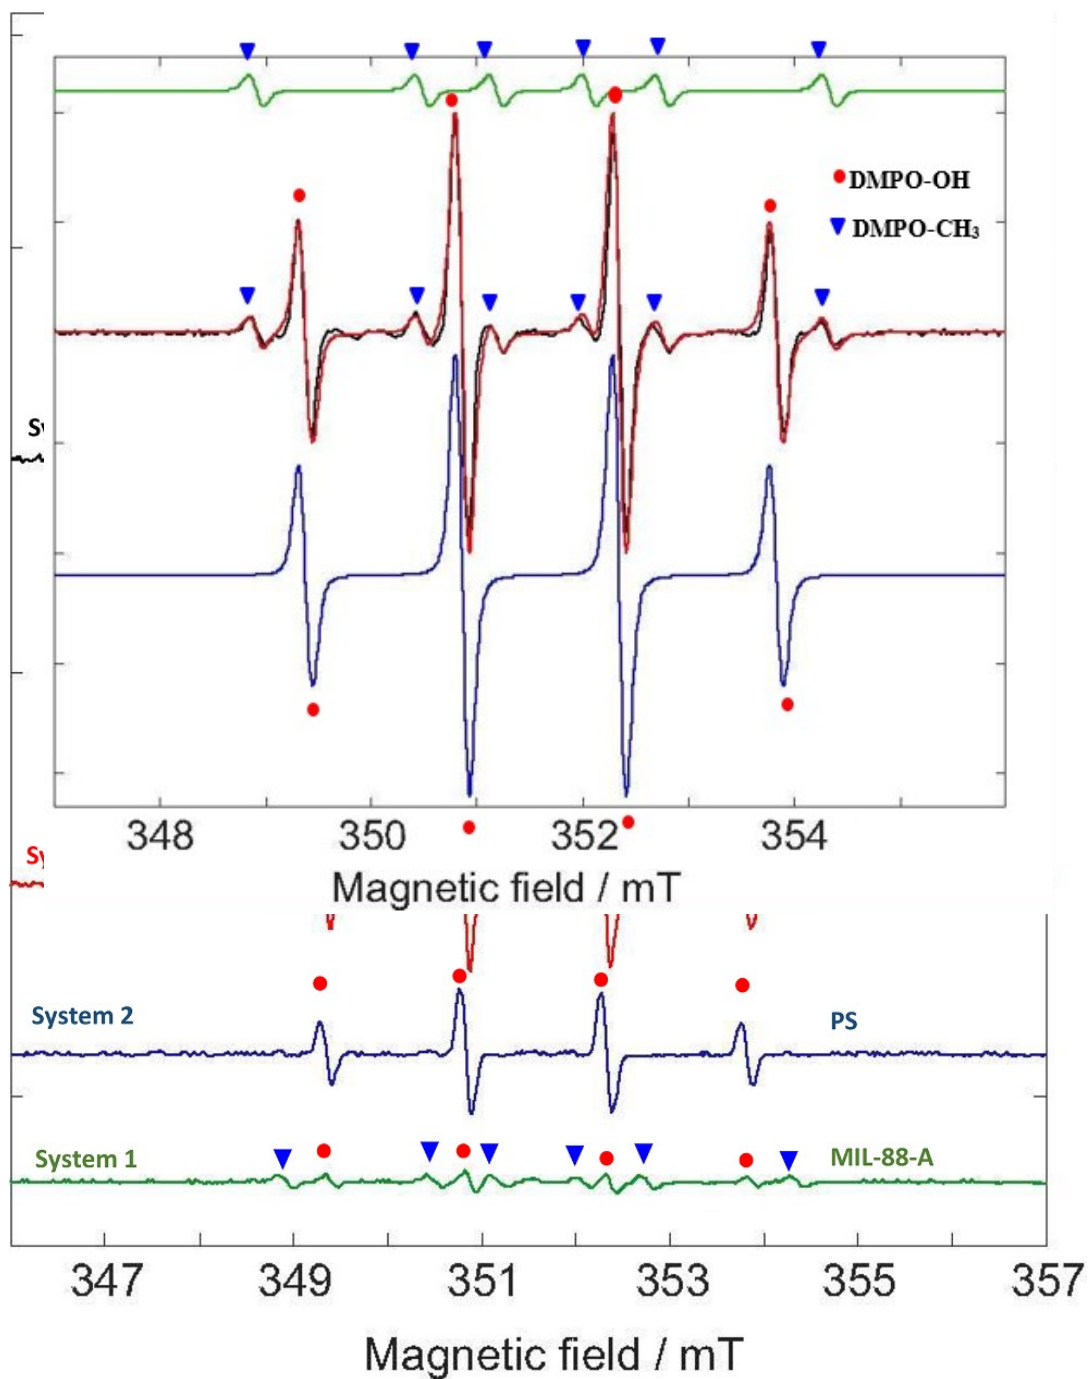

**Fig. S5.** EPR spectra of DMPO-radical adducts in different reaction systems. Experimental conditions: [PS] = 2.5 mM, [MIL-88-A] = 12.5 mg L<sup>-1</sup>, [DMPO] = 100 mM. The acquisition duration of EPR spectra is about 100 min for all systems.



**Fig. S6.** EPR spectra. Green – simulated EPR spectrum for trapped methyl radicals.  $a_N = 1.58$  mT,  $a_H = 2.28$  mT. Blue – simulated EPR spectrum for trapped hydroxyl radicals.  $a_N = 1.49$  mT,  $a_H = 1.49$  mT. Red – the sum of the above two simulated trapped radical spectra. Black – experimental EPR spectrum under the following Experimental conditions: [PS] = 2.5 mM, [MIL-88-A] = 12.5 mg L<sup>-1</sup>, [DMPO] = 100 mM.

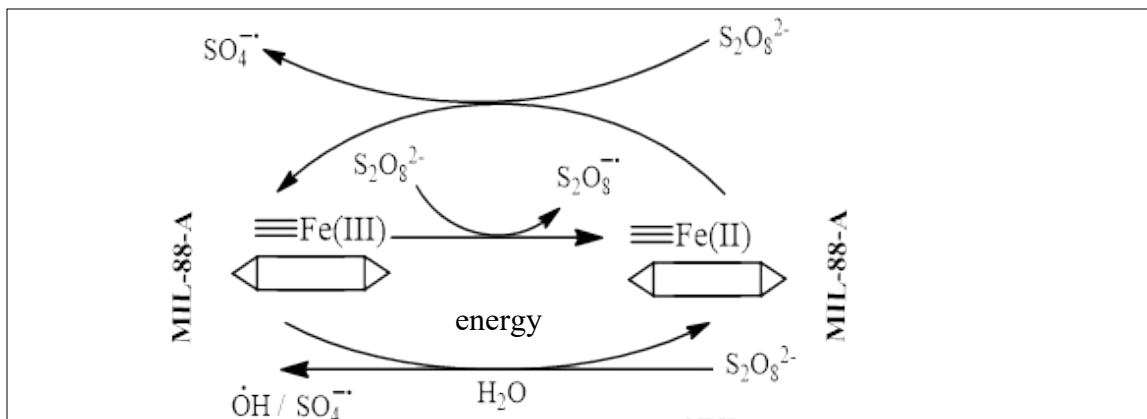

**Fig. S7.** Activation mechanism of PS in the UVA/MIL-88-A system

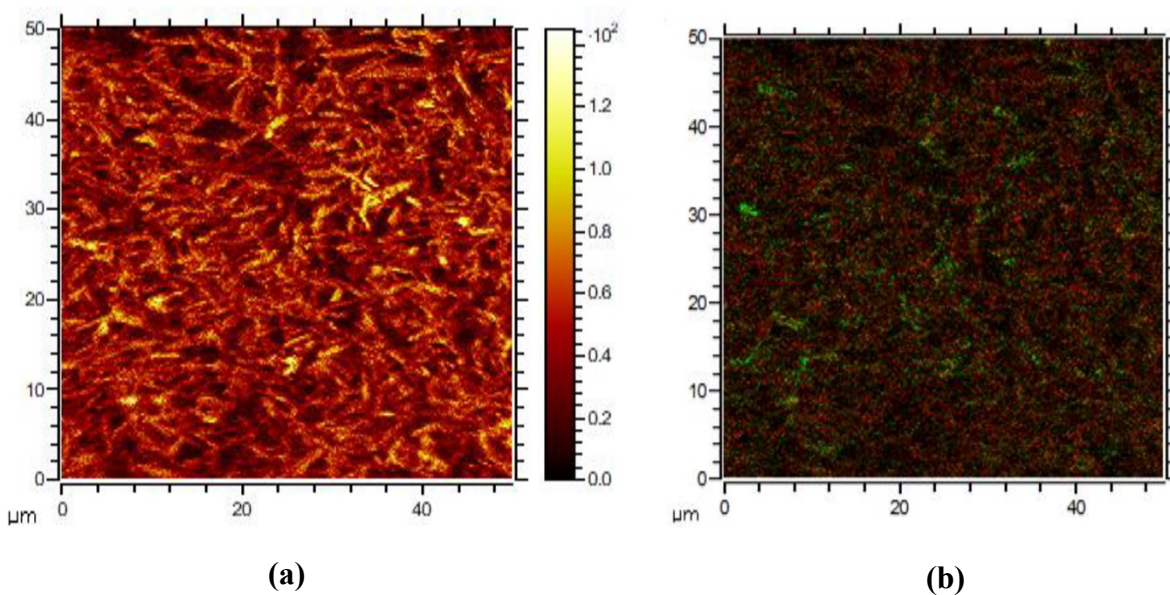

**Fig. S8.** TOF-SIMS characterization results: (a) Image of the sum of all positive secondary ions of the MIL-88-A as prepared in the presence of NAP and PS at  $t = 80$  min. The color scale goes from black (lack of emission) to white (saturated emission). (b) Overlay of the characteristic peak of MIL-88-A,  $Fe^+$  ion at  $m/z$  56 image (red color) and the characteristic peak of decarboxylated NAP at  $m/z$  185.0961 image (green color).
